# Supplementary material
Source: PubMed Central journal article supplement (PMC7966418)
Supplement: 2836_materials.pdf [file 2836_materials.pdf]

**On-line Table 1: Baseline characteristics of enrolled patients**

|                           | Ruptured                           |                                            | Unruptured                         |                                            | All                                |                                            |
|---------------------------|------------------------------------|--------------------------------------------|------------------------------------|--------------------------------------------|------------------------------------|--------------------------------------------|
|                           | Cerecyte<br>(n = 114)<br>(No.) (%) | Bare<br>Platinum<br>(n = 119)<br>(No.) (%) | Cerecyte<br>(n = 133)<br>(No.) (%) | Bare<br>Platinum<br>(n = 131)<br>(No.) (%) | Cerecyte<br>(n = 247)<br>(No.) (%) | Bare<br>Platinum<br>(n = 250)<br>(No.) (%) |
| Female                    | 68 (59.6)                          | 77 (64.7)                                  | 105 (78.9)                         | 104 (79.4)                                 | 173 (70.0)                         | 181 (72.4)                                 |
| Age (yr)<br>(mean) (SD)   | 48.5<br>(10.2)                     | 50.3<br>(10.4)                             | 51.7<br>(10.2)                     | 51.8<br>(9.8)                              | 50.2<br>(10.3)                     | 51.1<br>(10.1)                             |
| Target aneurysm size (mm) |                                    |                                            |                                    |                                            |                                    |                                            |
| 2–4.9                     | 17 (14.9)                          | 21 (17.6)                                  | 22 (16.5)                          | 21 (16.0)                                  | 39 (15.8)                          | 42 (16.8)                                  |
| 5–9.9                     | 80 (70.2)                          | 85 (71.4)                                  | 97 (72.9)                          | 96 (73.3)                                  | 177 (71.7)                         | 181 (72.4)                                 |
| 10–18                     | 17 (14.9)                          | 13 (10.9)                                  | 14 (10.5)                          | 14 (10.7)                                  | 31 (12.6)                          | 27 (10.8)                                  |
| Dome-to-neck ratio (mm)   |                                    |                                            |                                    |                                            |                                    |                                            |
| ≤1.5                      | 15 (13.2)                          | 13 (10.9)                                  | 32 (24.1)                          | 33 (25.2)                                  | 47 (19.0)                          | 46 (18.4)                                  |
| >1.5                      | 99 (86.8)                          | 106 (89.1)                                 | 101 (75.8)                         | 98 (74.8)                                  | 200 (81.0)                         | 204 (81.6)                                 |
| Aneurysm location         |                                    |                                            |                                    |                                            |                                    |                                            |
| Internal carotid          | 37 (32.4)                          | 42 (35.3)                                  | 65 (48.9)                          | 73 (55.7)                                  | 102 (41.3)                         | 115 (46.0)                                 |
| Anterior cerebral         | 50 (43.8)                          | 43 (36.1)                                  | 19 (14.3)                          | 23 (17.5)                                  | 69 (27.9)                          | 66 (26.4)                                  |
| Middle cerebral           | 16 (14.0)                          | 20 (16.8)                                  | 27 (20.3)                          | 21 (16.0)                                  | 43 (17.4)                          | 41 (16.4)                                  |
| Posterior circulation     | 11 (9.6)                           | 14 (11.8)                                  | 22 (16.5)                          | 14 (10.7)                                  | 33 (13.4)                          | 28 (11.2)                                  |

**On-line Table 2: Adverse procedural events up to 24 hours<sup>a</sup>**

|                                                     | Ruptured                           |                                            | P    | Unruptured                         |                                            | P   | All                                |                                            | P    |
|-----------------------------------------------------|------------------------------------|--------------------------------------------|------|------------------------------------|--------------------------------------------|-----|------------------------------------|--------------------------------------------|------|
|                                                     | Cerecyte<br>(n = 114)<br>(No.) (%) | Bare<br>Platinum<br>(n = 119)<br>(No.) (%) |      | Cerecyte<br>(n = 133)<br>(No.) (%) | Bare<br>Platinum<br>(n = 131)<br>(No.) (%) |     | Cerecyte<br>(n = 247)<br>(No.) (%) | Bare<br>Platinum<br>(n = 250)<br>(No.) (%) |      |
| No. of patients with adverse procedural events      | 21 (18.4)                          | 13 (10.9)                                  | .052 | 15 (11.3) <sup>b</sup>             | 12 (9.2)                                   | .28 | 36 (14.6)                          | 25 (10.0)                                  | .060 |
| Aneurysm rupture                                    | 8 (7.0)                            | 5 (4.2)                                    | .18  | 3 (2.3)                            | 2 (1.5)                                    | .33 | 11 (4.5)                           | 7 (2.8)                                    | .16  |
| Thromboembolic complication                         | 7 (6.1)                            | 4 (3.4)                                    | .16  | 10 (7.5) <sup>c</sup>              | 7 (5.3)                                    | .24 | 17 (6.9)                           | 11 (4.4)                                   | .11  |
| Other complications grouped                         | 6 (5.3) <sup>e</sup>               | 4 (3.4) <sup>f</sup>                       | .24  | 3 (2.3) <sup>g</sup>               | 3 (2.3) <sup>h</sup>                       | .51 | 9 (3.6)                            | 7 (2.8)                                    | .30  |
| Failed embolizations (no coils placed) <sup>d</sup> | 1 (0.9)                            | 4 (3.4)                                    | .91  | 6 (4.5)                            | 3 (2.3)                                    | .16 | 7 (2.8)                            | 7 (2.8)                                    | .49  |

<sup>a</sup> P values are for 1-sided Blackwelder tests.

<sup>b</sup> One patient had both a procedural aneurysm rupture and a thromboembolic complication.

<sup>c</sup> Two patients who had a thromboembolic event within 24 hours were included as defined in the trial protocol.

<sup>d</sup> Reasons for failure: 5 unsuitable anatomies, 4 catheter problems, 2 inability to place coils, 3 not known. Of these, 1 patient was successfully coiled 1 week later, 4 had clipping, 9 remained untreated (7 UIA, 2 ruptured; of these, 1 had a follow-up MRI at 2/12 but no further treatment, and 1 had no follow-up).

<sup>e</sup> Three coil-related: 1 tail protrusion of last coil, 1 first coil placed then difficulty recatheterizing aneurysm, 1 failure to place Cerecyte coils so platinum coils used (crossover); 3 complications unrelated to coils.

<sup>f</sup> One coil-related: small coil tail in parent vessel; 3 complications unrelated to coils.

<sup>g</sup> Three complications unrelated to coils.

<sup>h</sup> Two coil-related: 1 loop of first coil in parent artery, 1 coil loop in middle cerebral artery inferior trunk.

**On-line Table 3: Adverse periprocedural events up to 24 hours resulting in neurological deterioration<sup>a</sup>**

|                                          | Ruptured                           |                                            | P   | Unruptured                         |                                            | P    | All                                |                                            | P    |
|------------------------------------------|------------------------------------|--------------------------------------------|-----|------------------------------------|--------------------------------------------|------|------------------------------------|--------------------------------------------|------|
|                                          | Cerecyte<br>(n = 114)<br>(No.) (%) | Bare<br>Platinum<br>(n = 119)<br>(No.) (%) |     | Cerecyte<br>(n = 133)<br>(No.) (%) | Bare<br>Platinum<br>(n = 131)<br>(No.) (%) |      | Cerecyte<br>(n = 247)<br>(No.) (%) | Bare<br>Platinum<br>(n = 250)<br>(No.) (%) |      |
| No. of patients with neuro-deterioration | 5 (4.4)                            | 3 (2.5)                                    | .22 | 5 (3.8)                            | 2 (1.5)                                    | .13  | 10 (4.0)                           | 5 (2.0)                                    | .091 |
| Neuro-deterioration: aneurysm rupture    | 2 (1.8)                            | 1 (0.8)                                    | .27 | 2 (1.5)                            | 0 (0.0)                                    | .077 | 4 (1.6)                            | 1 (0.4)                                    | .087 |
| Neuro-deterioration: thromboembolic      | 1 (0.9)                            | 1 (0.8)                                    | .49 | 2 (1.5)                            | 1 (0.8)                                    | .28  | 3 (1.2)                            | 2 (0.8)                                    | .32  |
| Neuro-deterioration: other causes        | 2 (1.8)                            | 1 (0.8)                                    | .27 | 1 (0.8)                            | 1 (0.8)                                    | .50  | 3 (1.2)                            | 2 (0.8)                                    | .32  |

<sup>a</sup> P values are for 1-sided Blackwelder tests.

**On-line Table 4: Postprocedural adverse events, >24 hours to discharge<sup>a</sup>**

|                                               | Ruptured                                   |                                            |          | Unruptured                                 |                                            |          | All                                        |                                            |          |
|-----------------------------------------------|--------------------------------------------|--------------------------------------------|----------|--------------------------------------------|--------------------------------------------|----------|--------------------------------------------|--------------------------------------------|----------|
|                                               | Bare                                       |                                            | <i>P</i> | Bare                                       |                                            | <i>P</i> | Bare                                       |                                            | <i>P</i> |
|                                               | Cerecyte<br>( <i>n</i> = 114)<br>(No.) (%) | Platinum<br>( <i>n</i> = 119)<br>(No.) (%) |          | Cerecyte<br>( <i>n</i> = 133)<br>(No.) (%) | Platinum<br>( <i>n</i> = 131)<br>(No.) (%) |          | Cerecyte<br>( <i>n</i> = 247)<br>(No.) (%) | Platinum<br>( <i>n</i> = 250)<br>(No.) (%) |          |
| Delayed cerebral ischemic deficit (vasospasm) | 14 (12.3)                                  | 15 (12.6)                                  | .53      | 1 (0.8) <sup>b</sup>                       | 0 (0.0)                                    | .16      | 15 (6.1)                                   | 15 (6.0)                                   | .49      |
| Neuro-deterioration                           | 10 (8.8) <sup>c</sup>                      | 15 (12.6) <sup>d</sup>                     | .83      | 2 (1.5) <sup>e</sup>                       | 3 (2.3) <sup>f</sup>                       | .68      | 12 (4.9)                                   | 18 (7.2)                                   | .86      |
| Infection                                     | 6 (5.3)                                    | 6 (5.0)                                    | .47      | 3 (2.3)                                    | 3 (2.3)                                    | .51      | 9 (3.6)                                    | 9 (3.6)                                    | .49      |
| Hydrocephalus                                 | 4 (3.5)                                    | 5 (4.2)                                    | .61      | 1 (0.8) <sup>b</sup>                       | 1 (0.8) <sup>b</sup>                       | .50      | 5 (2.0)                                    | 6 (2.4)                                    | .61      |
| Pulmonary complications                       | 3 (2.6)                                    | 2 (1.7)                                    | .31      | 2 (1.5)                                    | 0 (0.0)                                    | .077     | 5 (2.0)                                    | 2 (0.8)                                    | .12      |
| Seizures                                      | 0 (0.0)                                    | 0 (0.0)                                    | –        | 0 (0.0)                                    | 1 (0.8)                                    | .84      | 0 (0.0)                                    | 1 (0.4)                                    | .84      |
| Death <sup>g</sup>                            | 2 (1.8)                                    | 0 (0.0)                                    | .077     | 0 (0.0)                                    | 0 (0.0)                                    | –        | 2 (0.8)                                    | 0 (0.0)                                    | .078     |
| Other <sup>h</sup>                            | 10 (8.8)                                   | 16 (13.4)                                  | .87      | 10 (7.5)                                   | 8 (6.1)                                    | .32      | 20 (8.1)                                   | 24 (9.6)                                   | .72      |

<sup>a</sup> *P* values are for 1-sided Blackwelder tests.

<sup>b</sup> Vasospasm and hydrocephalus in the unruptured group were associated with procedural rupture and SAH.

<sup>c</sup> Seven vasospasm (1 died), 2 hydrocephalus, 1 postprocedural rebleed (died).

<sup>d</sup> Seven vasospasm, 2 thrombolytic, 2 hydrocephalus, 1 TIA, 2 complications of SAH, 1 hemiparesis postclipping.

<sup>e</sup> One vasospasm, 1 hydrocephalus.

<sup>f</sup> One hydrocephalus, 1 thromboembolic, 1 complication due to medication.

<sup>g</sup> Causes of death: delayed cerebral ischemia due to vasospasm, postprocedural rebleed.

<sup>h</sup> Other includes 9 cardiac, 15 groin complications (5 classed as serious groin hematoma), 4 pain (nonheadache), and 16 general complications of SAH.

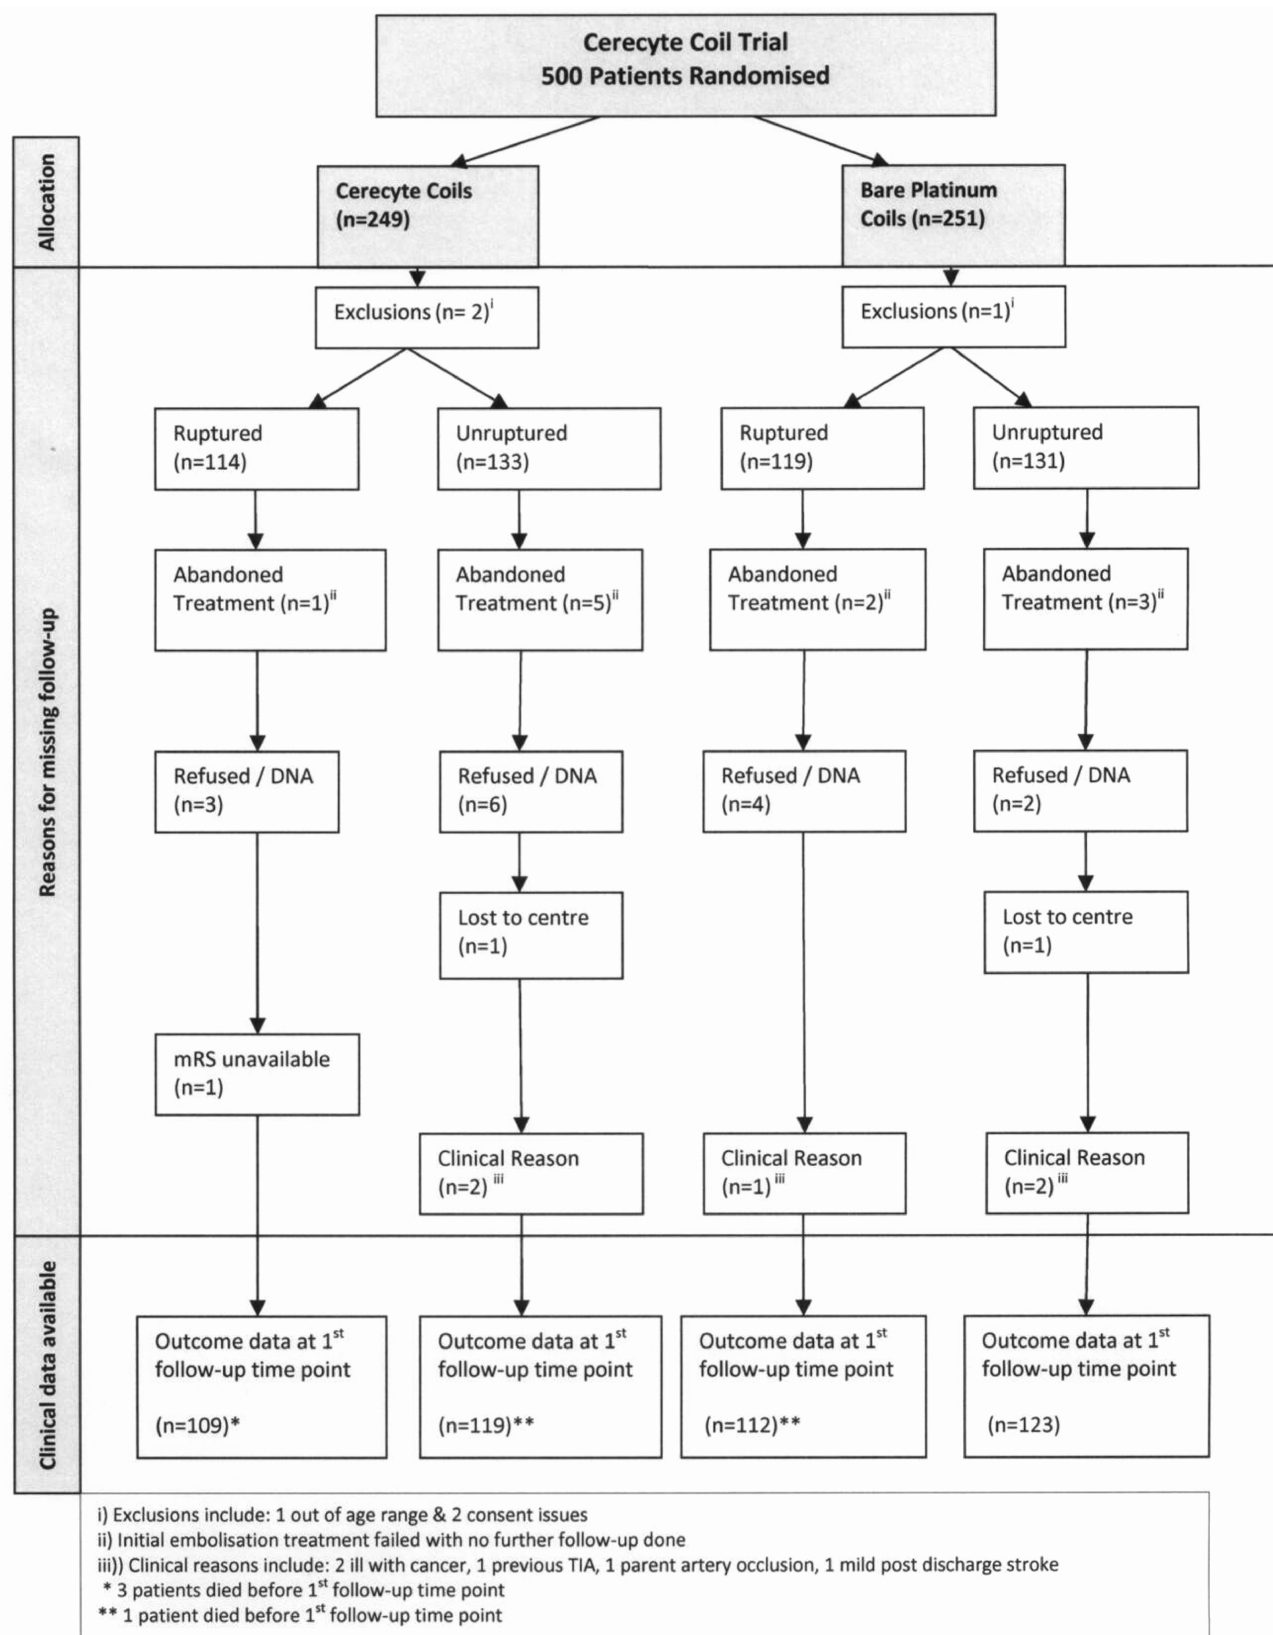

**On-line Fig 1.** Consort diagram showing patient flow to secondary end point—clinical outcome; DNA indicates did not attend.
